# Supplementary material
Source: publisher site journal article supplement (https://www.dovepress.com/article/221279)

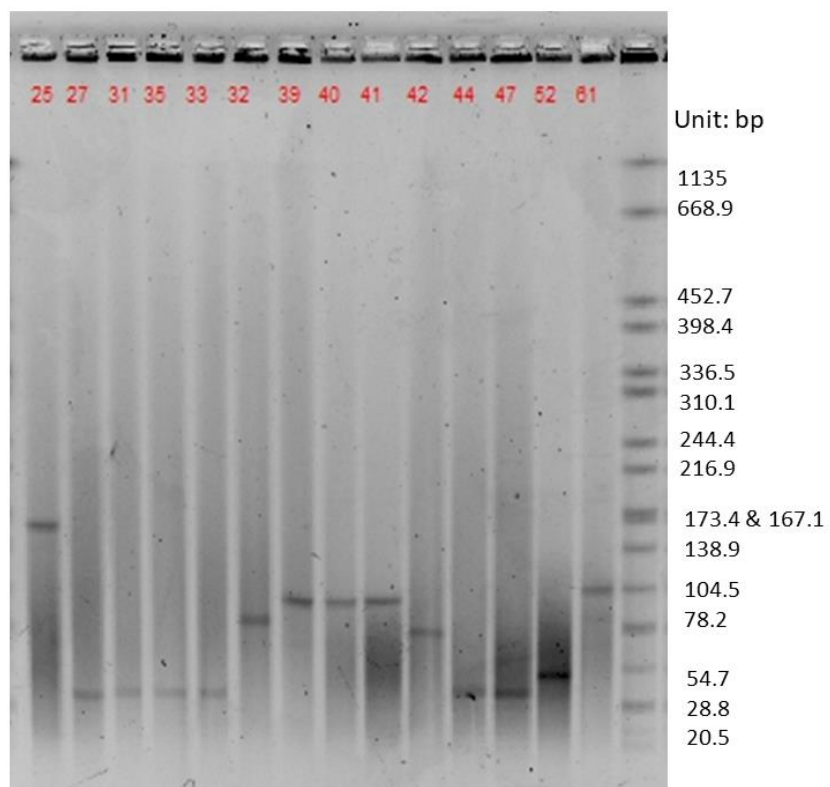

**Supplementary Fig.S1** S1 nuclease-PFGE pattern of 14 *bla*<sub>KPC-2</sub> carrying plasmids

Supplement: Supplementary file 1 [file get_supplementary_file.php]
